# Supplementary material
Source: Springer Nature journal article supplement (https://www.springermedizin.de/resource/supplementary/12974_2011_411_MOESM1_ESM.pdf/9601238)

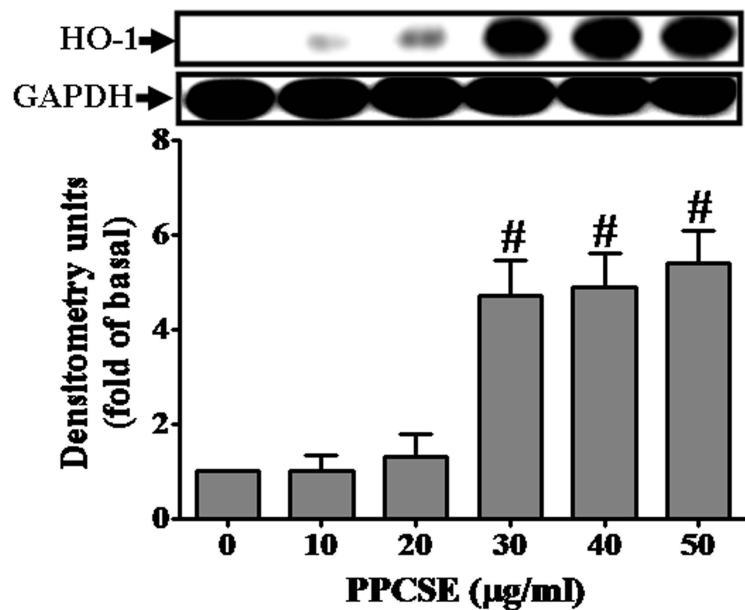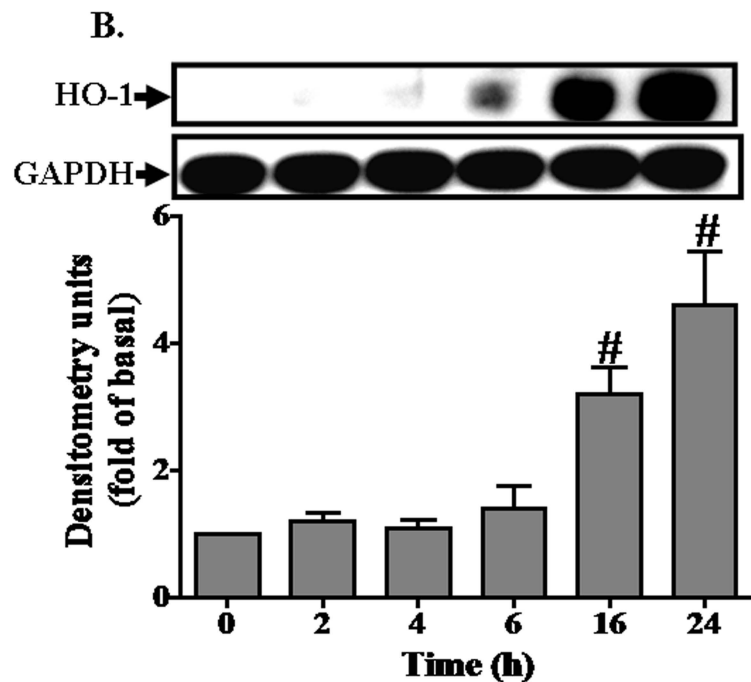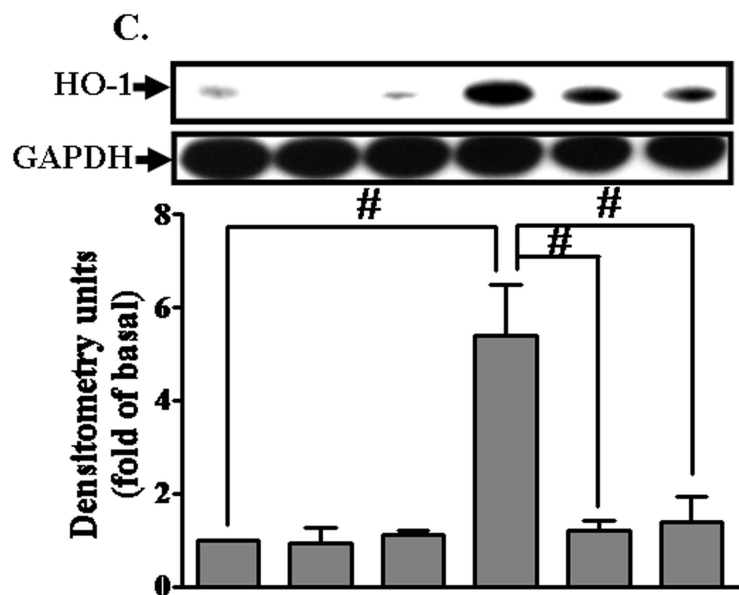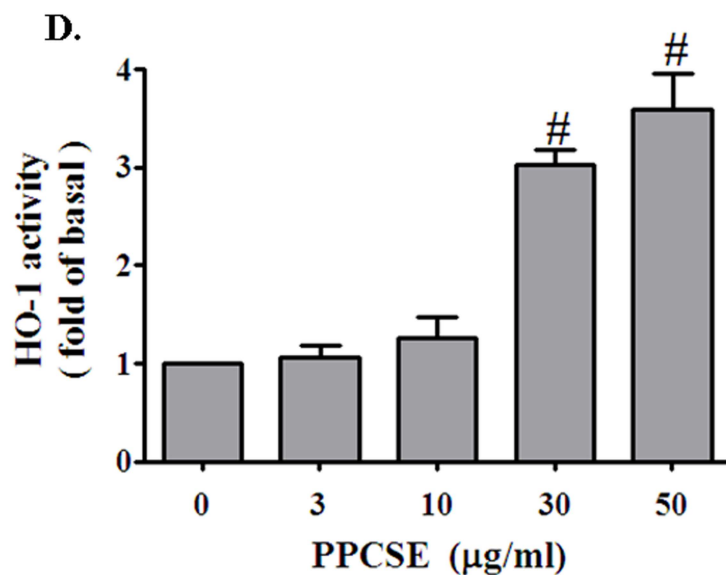

|                            |   |     |     |     |   |
|----------------------------|---|-----|-----|-----|---|
| Act. D (nM)                | — | 100 | —   | 100 | — |
| CHX (nM)                   | — |     | 100 | —   |   |
| PPCSE ( $\mu\text{g/ml}$ ) | — |     |     | 30  |   |

Supplement: MOESM1 [file 9601238]
